# Supplementary material for: Ionizing Radiation induction of cholesterol biosynthesis in Lung tissue
Source: PubMed Central journal article supplement (PMC6715797; doi:10.1038/s41598-019-48972-x), 2019-08-29

Supplementary Information:

“Ionizing Radiation induction of cholesterol biosynthesis in Lung tissue”

Erica Werner, Andrew Alter, Qiudong Deng, Eric B. Dammer, Ya Wang, David S. Yu, Duc M. Duong, Nicholas T. Seyfried and Paul W. Doetsch

Supplementary Table 1: List of proteins regulated by Fe ion exposure.

| Gene symbol | Name of the protein              | Protein.IDs            | f01     | f02    | f03   | n01    | n02   | n03   | log.p  | Pvalue   | threshold | Differen | fold change(N/ | Fold (F/N |
|-------------|----------------------------------|------------------------|---------|--------|-------|--------|-------|-------|--------|----------|-----------|----------|----------------|-----------|
| ALDH3A1     | Aldehyde dehydrogenase 3 fam     | tr C9JMC5 C9JMC5_HUMA  | 7.49601 | 7.8445 | 7.978 | 8.4173 | 8.714 | 8.347 | -1.773 | 0.0169   | TRUE      | -0.72    | 5.250043       | 0.19041   |
| HSPB1       | Heat shock protein beta 1        | sp P04792 HSPB1_HUMAN  | 9.16436 | 9.1934 | 9.147 | 9.3701 | 9.721 | 9.559 | -1.694 | 0.0202   | TRUE      | -0.38    | 2.408609       | 0.41511   |
| BCAM        | Basal cell adhesion molecule     | tr A0A087WXM8 A0A087V  | 7.47551 | 7.4963 | 7.547 | 7.6879 | 8.117 | 7.82  | -1.34  | 0.0457   | TRUE      | -0.37    | 2.337496       | 0.42781   |
| CA2         | Carbonic anhydrase 2             | sp P00918 CAH2_HUMAN;  | 7.66075 | 7.6376 | 7.462 | 7.8712 | 8.095 | 7.805 | -1.451 | 0.0354   | TRUE      | -0.34    | 2.173935       | 0.4011    |
| PTK7        | Protein Tyrosine Kinase 7        | sp Q13308-3 PTK7_HUMA  | 7.74636 | 7.9971 | 7.86  | 8.0956 | 8.303 | 8.128 | -1.471 | 0.0338   | TRUE      | -0.31    | 2.031725       | 0.49211   |
| SPRR1B      | Cornifin B                       | sp P22528 SPRR1B_HUMAN | 7.97578 | 7.8686 | 7.942 | 8.1469 | 8.381 | 8.157 | -1.65  | 0.0224   | TRUE      | -0.3     | 1.993225       | 0.5011    |
| AKR1C2      | Aldo-keto reductase family 1 m   | sp P52895 AK1C2_HUMAN  | 7.82009 | 7.863  | 7.891 | 8.0114 | 8.241 | 8.155 | -1.778 | 0.0167   | TRUE      | -0.28    | 1.895976       | 0.52741   |
| PCK2        | Phosphoenolpyruvate carboxy      | sp Q16822 PCKGM_HUMA   | 8.33044 | 8.3008 | 8.362 | 8.5664 | 8.637 | 8.579 | -3.144 | 0.0007   | TRUE      | -0.26    | 1.833137       | 0.54551   |
| CTSD        | Cathepsin D                      | sp P07339 CATD_HUMAN;  | 9.12262 | 9.1886 | 9.149 | 9.2976 | 9.56  | 9.376 | -1.491 | 0.0323   | TRUE      | -0.26    | 1.810984       | 0.55211   |
| HBB         | Hemoglobin beta                  | CON_P02070;CON_Q35X    | 7.8013  | 7.6399 | 7.777 | 7.9511 | 7.936 | 8.065 | -1.713 | 0.0194   | TRUE      | -0.24    | 1.756484       | 0.56931   |
| HIST1H1C    | Histone H1C                      | sp P16403 H12_HUMAN;sp | 9.6761  | 9.852  | 9.73  | 9.9863 | 9.975 | 9.967 | -1.887 | 0.013    | TRUE      | -0.22    | 1.672775       | 0.59781   |
| DNAJC2      | DnaJ homolog subfamily C mem     | sp Q99543-2 DNJC2_HUM  | 7.53481 | 7.3096 | 7.434 | 7.6012 | 7.644 | 7.669 | -1.447 | 0.0358   | TRUE      | -0.21    | 1.628764       | 0.61391   |
| FAHD1       | Acylpyruvase                     | sp Q6P587 FAHD1_HUMA   | 7.77815 | 7.9304 | 7.848 | 8.0288 | 8.137 | 8.013 | -1.617 | 0.0242   | TRUE      | -0.21    | 1.612476       | 0.62011   |
| ECH1        | Delta(3,5)-Delta(2,4)-dienoyl-C  | sp Q13011 ECH1_HUMAN;  | 8.04727 | 8.1538 | 8.088 | 8.2642 | 8.364 | 8.283 | -2.049 | 0.0089   | TRUE      | -0.21    | 1.612273       | 0.62021   |
| H1FX        | Histone 1x                       | sp Q92522 H1X_HUMAN    | 8.34009 | 8.3921 | 8.368 | 8.6281 | 8.484 | 8.6   | -1.921 | 0.012    | TRUE      | -0.2     | 1.59852        | 0.62551   |
| MUT         | Methylmalonyl-CoA mutase         | sp P22033 MUTA_HUMAN   | 7.286   | 7.1965 | 7.152 | 7.4097 | 7.438 | 7.366 | -1.908 | 0.0124   | TRUE      | -0.19    | 1.560255       | 0.64091   |
| SDCBP       | Syntenin-1                       | sp Q00560 SDCB1_HUMAN  | 8.16473 | 8.1505 | 8.154 | 7.9816 | 7.97  | 7.991 | -4.675 | 2.11E-05 | TRUE      | 0.175    | 0.667743       | 1.49751   |
| TTI1        | TELO2-interacting protein 1 hor  | sp Q43156 TTI1_HUMAN   | 7.75163 | 7.6808 | 7.637 | 7.4246 | 7.569 | 7.538 | -1.503 | 0.0314   | TRUE      | 0.179    | 0.661801       | 1.51101   |
| SCARB1      | Scavenger receptor class B mem   | sp Q8WTV0-4 SCR1_HUM   | 7.77851 | 7.8861 | 7.795 | 7.569  | 7.62  | 7.728 | -1.461 | 0.0346   | TRUE      | 0.181    | 0.659439       | 1.51641   |
| RBMS2       | RNA-binding motif, single-stran  | sp Q15434 RBMS2_HUMA   | 7.89264 | 7.7022 | 7.791 | 7.5856 | 7.602 | 7.646 | -1.473 | 0.0337   | TRUE      | 0.184    | 0.654854       | 1.52701   |
| TTC37       | Tetratricopeptide repeat protei  | sp Q6PGP7 TTC37_HUMAN  | 7.91382 | 7.7741 | 7.869 | 7.6294 | 7.736 | 7.628 | -1.582 | 0.0262   | TRUE      | 0.188    | 0.649082       | 1.54061   |
| LAMC2       | Laminin subunit gamma-2          | sp Q13753 LAMC2_HUMA   | 9.23567 | 9.2228 | 9.175 | 9.0962 | 8.992 | 8.981 | -1.994 | 0.0101   | TRUE      | 0.188    | 0.648302       | 1.54241   |
| WAPL        | Wings apart-like protein homol   | sp Q7Z5K2 WAPL_HUMAN   | 7.0271  | 6.9376 | 7.043 | 6.8891 | 6.733 | 6.806 | -1.591 | 0.0257   | TRUE      | 0.193    | 0.640663       | 1.56081   |
| LPXN        | Leupaxin                         | sp Q60711 LPXN_HUMAN;  | 8.45487 | 8.5606 | 8.528 | 8.2634 | 8.33  | 8.35  | -2.101 | 0.0079   | TRUE      | 0.2      | 0.630612       | 1.58571   |
| CSK         | Tyrosine-protein kinase CSK      | sp P41240 CSK_HUMAN;tr | 7.96223 | 7.9202 | 7.991 | 7.71   | 7.645 | 7.853 | -1.571 | 0.0268   | TRUE      | 0.221    | 0.600552       | 1.66511   |
| SPATS2      | Spermatogenesis-associated se    | sp Q86XZ4 SPAS2_HUMAN  | 8.74995 | 8.7372 | 8.699 | 8.4128 | 8.601 | 8.499 | -1.785 | 0.0164   | TRUE      | 0.225    | 0.596101       | 1.67751   |
| CDKN2AIPNL  | CDKN2AIP N-terminal-like prote   | sp Q96HQ2 C2AIL_HUMAN  | 8.22037 | 8.1923 | 8.019 | 7.8805 | 7.828 | 8.015 | -1.311 | 0.0488   | TRUE      | 0.236    | 0.581137       | 1.72071   |
| CYP51A1     | Lanosterol 14-alpha demethyla    | sp Q16850 CP51A_HUMAN  | 8.6308  | 8.5143 | 8.586 | 8.3878 | 8.39  | 8.245 | -1.8   | 0.0159   | TRUE      | 0.236    | 0.580568       | 1.72241   |
| FSTL1       | Follistatin-related protein 1    | sp Q12841-2 FSTL1_HUMA | 6.7959  | 6.819  | 6.776 | 6.6571 | 6.524 | 6.499 | -2.023 | 0.0095   | TRUE      | 0.237    | 0.579648       | 1.72511   |
| ATP6V1H     | V-type proton ATPase subunit H   | sp Q9UI12-2 VATH_HUMA  | 7.97132 | 8.132  | 8.028 | 7.8374 | 7.884 | 7.685 | -1.471 | 0.0338   | TRUE      | 0.242    | 0.573063       | 1.74501   |
| HiGD1A      | HIG1 domain family member 1A     | tr Q9JAW5 C9JAW5_HUMA  | 8.03587 | 8.2226 | 8.062 | 7.7755 | 7.859 | 7.955 | -1.452 | 0.0353   | TRUE      | 0.244    | 0.570472       | 1.75291   |
| AAAS        | Aladin                           | tr F8VZ44 F8VZ44_HUMAN | 7.88056 | 7.7601 | 7.679 | 7.6426 | 7.521 | 7.413 | -1.31  | 0.0489   | TRUE      | 0.248    | 0.565317       | 1.76891   |
| THOC3       | THO complex subunit 3            | sp Q96J01 THOC3_HUMAN  | 8.1398  | 8.0464 | 8.121 | 7.8539 | 7.98  | 7.723 | -1.462 | 0.0345   | TRUE      | 0.25     | 0.562218       | 1.77861   |
| FADD        | FAS-associated death domain p    | sp Q13158 FADD_HUMAN   | 8.41752 | 8.2342 | 8.383 | 8.0198 | 8.061 | 8.192 | -1.532 | 0.0294   | TRUE      | 0.254    | 0.557322       | 1.7941    |
| UCK2        | Uridine-cytidine kinase 2        | sp Q9BZX2 UCK2_HUMAN;  | 7.94037 | 7.9337 | 7.854 | 7.798  | 7.57  | 7.555 | -1.492 | 0.0322   | TRUE      | 0.268    | 0.539327       | 1.85411   |
| CDK4        | Cyclin-dependent kinase 4        | sp P11802 CDK4_HUMAN;  | 9.8375  | 9.8062 | 9.83  | 9.5575 | 9.455 | 9.534 | -3.17  | 0.0007   | TRUE      | 0.309    | 0.490678       | 2.0311    |
| MSMO1       | Methylsterol monooxygenase 1     | sp Q15800-2 MSMO1_HU   | 7.90859 | 8.0245 | 7.968 | 7.6981 | 7.628 | 7.638 | -2.84  | 0.0014   | TRUE      | 0.312    | 0.487105       | 2.05291   |
| SQLE        | Squalene monooxygenase           | tr E7EVQ6 E7EVQ6_HUMA  | 8.02901 | 7.8967 | 7.89  | 7.6894 | 7.723 | 7.457 | -1.527 | 0.0297   | TRUE      | 0.315    | 0.483857       | 2.06671   |
| FN1         | Fibronectin                      | sp P02751-6 FINC_HUMAN | 7.99319 | 7.964  | 7.953 | 7.6453 | 7.642 | 7.663 | -4.722 | 1.90E-05 | TRUE      | 0.32     | 0.478235       | 2.09101   |
| DUT         | Deoxyuridine 5'-triphosphate n   | sp P33316-2 DUT_HUMAN  | 8.434   | 8.4649 | 8.371 | 8.2349 | 7.892 | 8.167 | -1.397 | 0.0401   | TRUE      | 0.325    | 0.473068       | 2.11381   |
| RFTN1       | Raft-linking protein, isoform CR | tr G3XAJ6 G3XAJ6_HUMAN | 7.79599 | 7.8211 | 7.772 | 7.4566 | 7.321 | 7.593 | -1.883 | 0.0131   | TRUE      | 0.34     | 0.457588       | 2.18531   |
| IPO11       | Importin-11                      | sp Q9UI16 IPO11_HUMAN  | 8.2006  | 8.2281 | 8.143 | 7.8818 | 7.802 | 7.808 | -3.247 | 0.0006   | TRUE      | 0.36     | 0.436384       | 2.29151   |
| FADS2       | Fatty acid desaturase 2          | sp Q95864 FADS2_HUMAN  | 8.61977 | 8.5036 | 8.553 | 8.2661 | 8.096 | 8.231 | -2.371 | 0.0043   | TRUE      | 0.361    | 0.435635       | 2.29511   |
| TRIP12      | E3 ubiquitin-protein ligase TRIP | sp Q14669-4 TRIPC_HUMA | 7.76426 | 7.9081 | 7.634 | 7.4494 | 7.231 | 7.449 | -1.662 | 0.0218   | TRUE      | 0.392    | 0.405216       | 2.46781   |
| THBS1       | Thrombospondin-1                 | sp P07996 TSP1_HUMAN;  | 9.15713 | 9.0691 | 9.105 | 8.8049 | 8.602 | 8.689 | -2.52  | 0.003    | TRUE      | 0.412    | 0.387663       | 2.57951   |
| HMGCS1      | Hydroxymethylglutaryl-CoA syn    | sp Q01581 HMGCS1_HUMA  | 9.4041  | 9.3766 | 9.384 | 9.0986 | 8.804 | 9.021 | -2.022 | 0.0095   | TRUE      | 0.413    | 0.386047       | 2.59031   |
| FADS1       | Fatty acid desaturase 1          | sp Q60427 FADS1_HUMAN  | 7.83135 | 7.5282 | 7.768 | 7.108  | 7.193 | 7.46  | -1.5   | 0.0316   | TRUE      | 0.456    | 0.350233       | 2.85521   |
| IL1A        | Interleukin-1 alpha              | sp P01583 IL1A_HUMAN   | 8.08982 | 7.9666 | 7.976 | 7.6892 | 7.517 | 7.452 | -2.318 | 0.0048   | TRUE      | 0.458    | 0.348204       | 2.87181   |
| F3          | Tissue factor                    | sp P13726 TF_HUMAN;sp  | 8.33194 | 8.3969 | 8.203 | 8.0594 | 7.521 | 7.819 | -1.433 | 0.0369   | TRUE      | 0.511    | 0.308524       | 3.24121   |
| ENAH        | Protein enabled homolog          | sp Q8N857 ENAH_HUMAN   | 7.30695 | 7.5495 | 7.766 | 6.8331 | 6.435 | 7     | -1.67  | 0.0214   | TRUE      | 0.785    | 0.164152       | 6.0911    |

Western Blots without cropping:

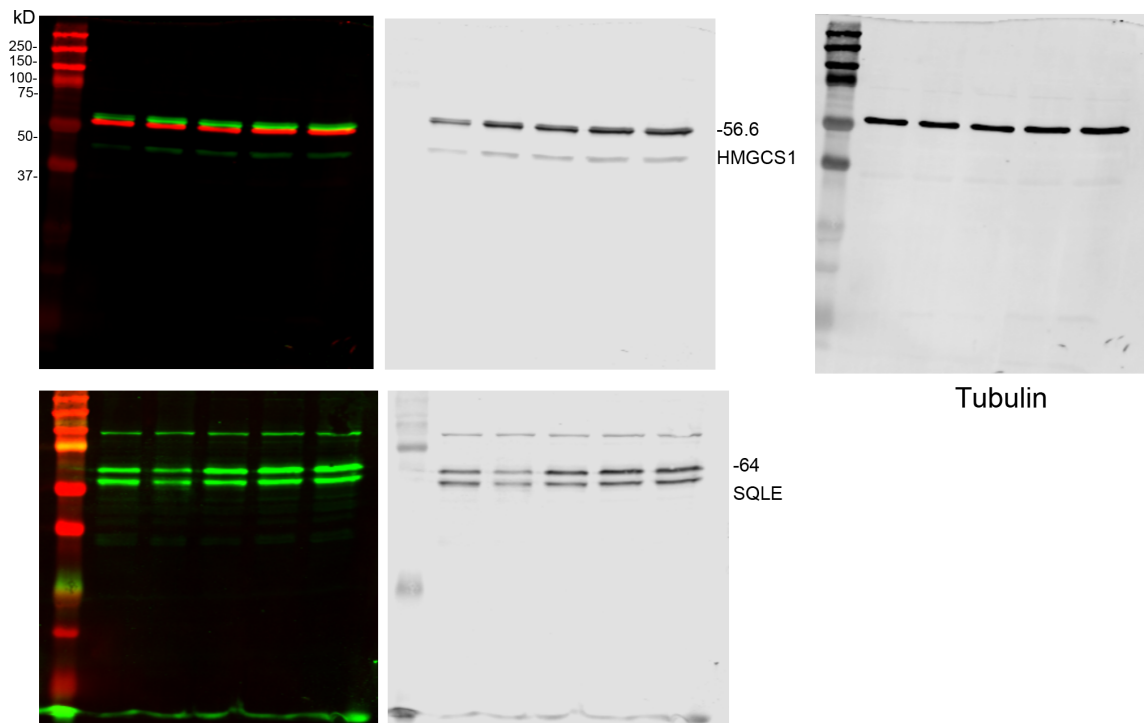

Supplement: 41598_2019_48972_MOESM1_ESM.pdf [file 41598_2019_48972_MOESM1_ESM.pdf]
